# Supplementary material for: In middle-aged and old obese patients, training intervention reduces leptin level: A meta-analysis
Source: PubMed Central journal article supplement (PMC5557366; doi:10.1371/journal.pone.0182801), 2017-08-15
Supplement: pone.0182801.s002.pdf [file pone.0182801.s002.pdf]

**S2 Table. Assessment of risk of bias of individual studies**

Risk of bias assessment was based on the Cochrane Collaboration's tool [29].

| Study, reference         | Random sequence generation | Allocation concealment | Blinding of personnel | Blinding of outcome assessment | Incomplete outcome data | Selective reporting | Overall risk of bias |
|--------------------------|----------------------------|------------------------|-----------------------|--------------------------------|-------------------------|---------------------|----------------------|
| Abbenhardt et al.[32]    | Yes                        | No                     | Yes                   | Unclear                        | Low risk                | Low risk            | Low risk             |
| Beavers et al. [33]      | Yes                        | No                     | Yes                   | Unclear                        | Low risk                | Low risk            | Low risk             |
| Courteix et al.[34]      | Yes                        | No                     | Yes                   | Unclear                        | Low risk                | Low risk            | Low risk             |
| Di Blasio et al.[35]     | No                         | No                     | Unclear               | Unclear                        | Low risk                | Low risk            | High risk            |
| Fatouros et al.[36]      | Yes                        | No                     | Yes                   | Unclear                        | Low risk                | Low risk            | Low risk             |
| Frank et al.[37]         | Yes                        | No                     | Yes                   | Unclear                        | Low risk                | Low risk            | Low risk             |
| Friedenreich et al. [38] | Yes                        | No                     | Yes                   | Unclear                        | Low risk                | Low risk            | Low risk             |
| Glynn et al. [39]        | No                         | No                     | Yes                   | Unclear                        | Low risk                | Low risk            | Low risk             |
| Guelfi et al. [40]       | No                         | No                     | Yes                   | Unclear                        | Low risk                | Low risk            | Low risk             |
| Klimcakova et al. [41]   | No                         | No                     | No                    | Unclear                        | Low risk                | Low risk            | High risk            |
| Malin et al.[42]         | No                         | No                     | No                    | Unclear                        | Low risk                | Low risk            | High risk            |
| Maltais et al. [43]      | No                         | No                     | No                    | Unclear                        | Low risk                | Low risk            | High risk            |
| Numao et al. [44]        | No                         | No                     | No                    | Unclear                        | Low risk                | Low risk            | High risk            |
| O'Leary et al. [45]      | No                         | No                     | No                    | Unclear                        | Low risk                | Low risk            | High risk            |
| Saafi et al.[46]         | No                         | No                     | Unclear               | Unclear                        | Low risk                | Low risk            | High risk            |
| Shah et al. [47]         | Yes                        | No                     | Yes                   | Unclear                        | Low risk                | Low risk            | Low risk             |
| Sjögren et al. [48]      | Yes                        | No                     | Yes                   | Unclear                        | Low risk                | Low risk            | Low risk             |
| Solomon et al. [49]      | No                         | No                     | No                    | Unclear                        | Low risk                | Low risk            | High risk            |
| Tan et al. [50]          | Yes                        | No                     | Yes                   | Unclear                        | Low risk                | Low risk            | Low risk             |
