# Supplementary material for: In middle-aged and old obese patients, training intervention reduces leptin level: A meta-analysis
Source: PubMed Central journal article supplement (PMC5557366; doi:10.1371/journal.pone.0182801), 2017-08-15
Supplement: pone.0182801.s003.pdf [file pone.0182801.s003.pdf]

**S3 Table. Evaluation of risk of bias across all the studies of the meta-analysis**

Regarding the quality of the evidence base as a whole, the scoring system used for Clinical Evidence reviews, GRADE was applied [30].

|                           | <b>Type of evidence</b>                                                  | <b>Quality</b><br>blinding and allocation<br>follow-up and withdrawals<br>sparse data                                                                                                                              | <b>Consistency</b><br>consistency of<br>outcomes                                                                     | <b>Directness</b><br>generalisability<br>of population                                                                           | <b>Effect size</b>                                | <b>GRADE<br/>Score</b><br>overall risk of<br>bias                                                                              |
|---------------------------|--------------------------------------------------------------------------|--------------------------------------------------------------------------------------------------------------------------------------------------------------------------------------------------------------------|----------------------------------------------------------------------------------------------------------------------|----------------------------------------------------------------------------------------------------------------------------------|---------------------------------------------------|--------------------------------------------------------------------------------------------------------------------------------|
| Score                     | +4                                                                       | -1                                                                                                                                                                                                                 | -1                                                                                                                   | 0                                                                                                                                | 0                                                 | 2                                                                                                                              |
| <b>Overall evaluation</b> | 9/19 randomized<br>clinical trials (RCT)<br>9/19 intervention<br>studies | Follow up was carried out and<br>withdrawals were reported in all<br>studies. However, blinding was<br>not possible in a training<br>intervention.<br>Blinding of personnel was<br>reported only in 11/19 studies. | Although most<br>studies showed<br>similar results,<br>there was<br>some<br>heterogeneity<br>across the<br>outcomes. | The population<br>and the<br>outcomes of<br>each study show<br>good<br>generalisability<br>for our<br>population of<br>interest. | Standardized<br>effect sizes did<br>not exceed 2. | Overall, the<br>quality of the<br>evidence base<br>was<br>downgraded to<br>low.<br>Risk of bias is<br>assessed as<br>moderate. |
